# Supplementary material
Source: Springer Nature journal article supplement (https://www.springermedizin.de/resource/supplementary/12955_2012_939_MOESM3_ESM.pdf/9558856)

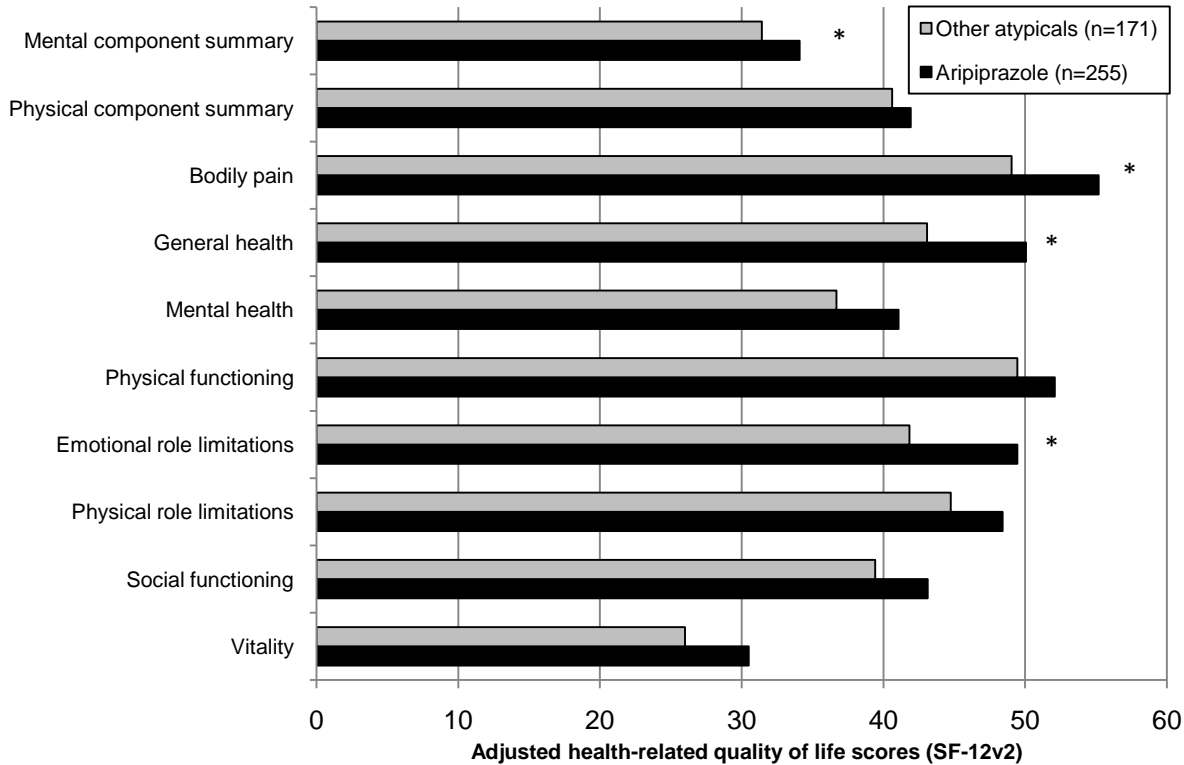

\* $p < .05$

Supplement: MOESM3 [file 9558856]
